# Supplementary material for: To a Scholar in the Stacks
Source: Royal Society of Chemistry journal article supplement (doi:10.1039/d1ay00083g), 2016-01-01
Supplement: d1ay00083g1.pdf [file d1ay00083g1.pdf]

### Supplementary Data

**Table S1.** Concentration and recovery percentages for Mixture A compounds (10 mg/L), injected at different times after preparation

| Concentration (mg/L) |         |         |              |           |        |            |        |             |
|----------------------|---------|---------|--------------|-----------|--------|------------|--------|-------------|
| Time (hours)         | Benzene | Toluene | Ethylbenzene | o- Xylene | Indene | m/p-Xylene | Indane | Naphthalene |
| 1                    | 10.74   | 10.65   | 10.51        | 10.25     | 9.97   | 10.88      | 10.48  | 10.52       |
| 2                    | 10.56   | 10.52   | 10.44        | 10.20     | 9.93   | 10.58      | 10.34  | 10.39       |
| 6                    | 10.81   | 10.75   | 10.62        | 10.59     | 10.27  | 10.45      | 10.44  | 10.47       |
| 12                   | 9.12    | 9.56    | 9.60         | 9.59      | 9.53   | 9.69       | 9.91   | 9.98        |
| 24                   | 6.55    | 7.62    | 7.96         | 8.02      | 7.65   | 8.25       | 8.63   | 8.80        |
| Recovery (%)         |         |         |              |           |        |            |        |             |
| 1                    | 107     | 107     | 105          | 103       | 100    | 109        | 105    | 105         |
| 2                    | 106     | 105     | 104          | 102       | 99     | 106        | 103    | 104         |
| 6                    | 108     | 107     | 106          | 106       | 103    | 104        | 104    | 105         |
| 12                   | 91      | 96      | 96           | 96        | 95     | 97         | 99     | 100         |
| 24                   | 66      | 76      | 80           | 80        | 77     | 83         | 86     | 88          |

**Table S2.** Specific conditions of each detector used in this study

| UV              |                |                     |                    |
|-----------------|----------------|---------------------|--------------------|
| Wavelength (nm) | Bandwidth (nm) | ref Wavelength (nm) | ref Bandwidth (nm) |
| 210             | 1              | 600                 | 1                  |
| FLD             |                |                     |                    |
| Excitation (nm) | Emission (nm)  | Sensitivity         | Filter wheel       |
| 210             | 260            | 4                   | auto               |
| 260             | 330            | 2                   | auto               |
| 280             | 310            | 4                   | auto               |

For the UV detector, the data collection rate is 50 and the response time is 500 ms.

The FLD detector has a multichannel performance, where the collection data rate and response time can be defined itself. In this study, the standard option with a maximum of 4hz data collection rate and the response time is less than 250 ms was used. When the filter wheel is auto, the detector automatically selects a filter wheel position.

**Table S3.** T-test P-values at each concentration tested for the compounds in mixture A, in groundwater. Highlighted columns

| Concentration | Mixture A |       |       |       |         |       |       |       |
|---------------|-----------|-------|-------|-------|---------|-------|-------|-------|
|               | B         | T     | E     | o-X   | m/p-X   | IA    | IE    | N     |
| 0.5 mg/L      | 0.429     | 0.868 | 0.678 | 0.669 | < 0.001 | 0.609 | 0.477 | 0.124 |
| 1 mg/L        | 0.076     | 0.220 | 0.009 | 0.038 | 0.002   | 0.189 | 0.189 | 0.110 |
| 2.5 mg/L      | 0.116     | 0.238 | 0.159 | 0.150 | 0.002   | 0.017 | 0.078 | 0.380 |
| 5 mg/L        | 0.676     | 0.208 | 0.205 | 0.359 | 0.001   | 0.141 | 0.009 | 0.004 |
| 7.5 mg/L      | 0.850     | 0.423 | 0.390 | 0.278 | 0.002   | 0.986 | 0.070 | 0.001 |
| 10 mg/L       | 0.762     | 0.530 | 0.432 | 0.278 | 0.001   | 0.158 | 0.097 | 0.003 |

represent p-values < 0.05, indicating a significant matrix effect

B; benzene, T; toluene, E; ethylbenzene, X; xylene, IA; indane, IE; indene, N; naphthalene

**Table S4.** T-test P-values at each concentration tested for the compounds in mixture B, in medium. Highlighted columns

| Concentration | Mixture B |                   |         |         |
|---------------|-----------|-------------------|---------|---------|
|               | Benzene   | Monochlorobenzene | 1,2-DCB | 1,4-DCB |
| 1 mg/L        | 0.055     | 0.031             | 0.276   | 0.059   |
| 2.5 mg/L      | 0.043     | 0.005             | 0.033   | 0.001   |
| 5 mg/L        | 0.007     | 0.020             | 0.062   | 0.017   |
| 7.5 mg/L      | 0.007     | 0.027             | 0.067   | 0.016   |
| 12 mg/L       | 0.020     | 0.016             | 0.017   | 0.053   |

represent p-values < 0.05, indicating a significant matrix effect

DCB; Dichlorobenzene

**Table S5.** Intercept, slope and R<sup>2</sup> values of the linear calibration line from the compounds of mixture A

| Compounds      | Mixture A |        |        |        |        |        |        |        |
|----------------|-----------|--------|--------|--------|--------|--------|--------|--------|
|                | B         | T      | E      | o-X    | m/p-X  | IA     | IE     | N      |
| Intercept (a)  | 12116     | 59006  | 72661  | 62736  | 639601 | 200006 | 231467 | 200006 |
| Slope (b)      | 2194      | 8707   | 9974   | 4655   | 81357  | 142190 | 35704  | 106999 |
| R <sup>2</sup> | 0.998     | 0.9984 | 0.9988 | 0.9968 | 0.9986 | 0.9993 | 0.9988 | 0.9994 |

B; benzene, T; toluene, E; ethylbenzene, X; xylene, IA; indane, IE; indene, N; naphthalene

**Table S6.** Intercept, slope and R<sup>2</sup> values of the linear calibration line from the compounds of mixture B

| Compounds      | Mixture B |                   |         |         |
|----------------|-----------|-------------------|---------|---------|
|                | Benzene   | Monochlorobenzene | 1,2-DCB | 1,4-DCB |
| Intercept (a)  | 0.8476    | 1.7032            | 1.4351  | 1.3978  |
| Slope (b)      | 0.324     | 0.8452            | 0.9298  | 1.1396  |
| R <sup>2</sup> | 0.9987    | 0.9971            | 0.9936  | 0.9916  |

DCB; Dichlorobenzene

**Table S7.** RSD values for each compound in mixture A, at different concentrations for the determination of intermediate precision of the method

| Intermediate Precision |       |       |      |      |       |       |      |      |
|------------------------|-------|-------|------|------|-------|-------|------|------|
| (%)                    |       |       |      |      |       |       |      |      |
| Concentration          | B     | T     | E    | o-X  | m/p-X | IA    | IE   | N    |
| 0.5 mg/L               | 10.91 | 8.19  | 7.30 | 4.34 | 1.11  | 9.15  | 2.09 | 0.25 |
| 1 mg/L                 | 14.39 | 10.35 | 7.29 | 5.88 | 0.25  | 9.24  | 0.59 | 2.22 |
| 2.5 mg/L               | 4.47  | 1.82  | 1.66 | 2.46 | 2.60  | 1.39  | 2.75 | 3.39 |
| 5 mg/L                 | 1.78  | 3.88  | 2.64 | 2.18 | 0.96  | 13.22 | 2.39 | 3.05 |
| 7.5 mg/L               | 4.58  | 3.38  | 1.98 | 1.83 | 3.12  | 0.61  | 1.49 | 2.81 |
| 10 mg/L                | 7.78  | 6.14  | 3.55 | 3.14 | 3.53  | 12.64 | 2.86 | 2.74 |

B; benzene, T; toluene, E; ethylbenzene, X; xylene, IA; indane, IE; indene, N; naphthalene

**Table S8.** RSD values for each compound in mixture B, at different concentrations for the determination of intermediate precision of the method

| Intermediate Precision |         |                   |         |         |
|------------------------|---------|-------------------|---------|---------|
| (%)                    |         |                   |         |         |
| Concentration          | Benzene | Monochlorobenzene | 1,2-DCB | 1,4-DCB |
| 1 mg/L                 | 2.88    | 0.68              | 2.56    | 3.51    |
| 2.5 mg/L               | 3.43    | 2.45              | 2.57    | 3.68    |
| 5 mg/L                 | 3.67    | 4.01              | 1.48    | 3.46    |
| 7.5 mg/L               | 1.57    | 1.89              | 2.46    | 3.16    |
| 12 mg/L                | 1.60    | 1.58              | 3.00    | 3.65    |

DCB; Dichlorobenzene

**Table S9.** Recovery values and mean recovery percentages obtained at 10 mg/L for mixture A.

| Recovery<br>(10 mg/L)      |      |       |       |       |       |       |       |       |
|----------------------------|------|-------|-------|-------|-------|-------|-------|-------|
|                            | B    | T     | E     | o-X   | m/p-X | IA    | IE    | N     |
| Sample 1                   | 8.70 | 10.31 | 10.05 | 10.09 | 10.19 | 10.18 | 10.31 | 10.64 |
| Sample 2                   | 8.88 | 10.89 | 11.24 | 11.63 | 10.98 | 10.85 | 10.89 | 11.36 |
| <b>Recovery<br/>(mean)</b> | 88%  | 106%  | 106%  | 109%  | 106%  | 105%  | 106%  | 110%  |

B; benzene, T; toluene, E; ethylbenzene, X; xylene, IA; indane, IE; indene, N; naphthalene

**Table S10.** Recovery values and mean recovery percentages obtained at 10 mg/L for mixture B.

| Recovery<br>(10 mg/L)      |         |       |         |         |
|----------------------------|---------|-------|---------|---------|
|                            | Benzene | MCB   | 1,2-DCB | 1,4-DCB |
| Sample 1                   | 8.33    | 10.62 | 9.49    | 9.35    |
| Sample 2                   | 8.01    | 10.23 | 9.32    | 9.50    |
| <b>Recovery<br/>(mean)</b> | 82%     | 104%  | 94%     | 94%     |

MCB; Monochlorobenzene, DCB; Dichlorobenzene
